# Supplementary material for: The in vivo estrogenic modulatory effect of bisphenol A (BPA) on Oreochromis mossambicus and prevention of early maturation of ovary by conjugates of intracellular laccase and silica nanoparticles
Source: Royal Society of Chemistry journal article supplement (doi:10.1039/c6ra15098e), 2016-01-01

**Sp-3) [Detection of maximum effective concentration]**

**figure: Supplementary data-Sp-3a) Ovary[Gradual increment of maturation].**

**10ppm**

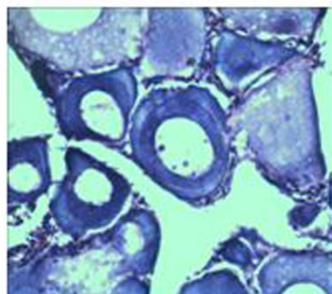

**20ppm**

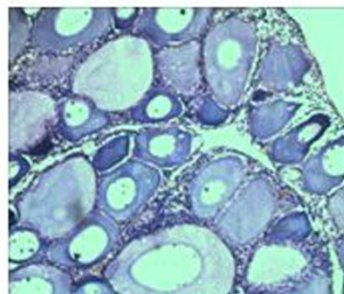

**30ppm**

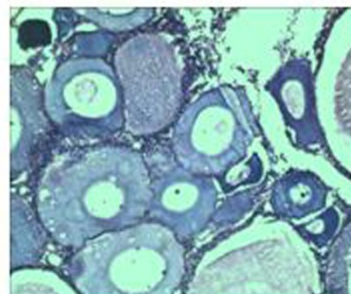

**40ppm**

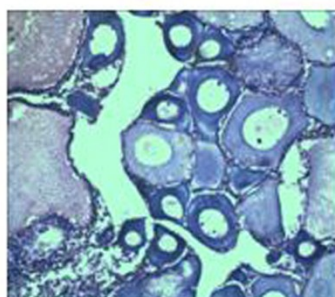

**50ppm**

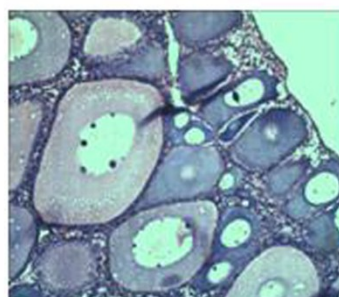

**60ppm**

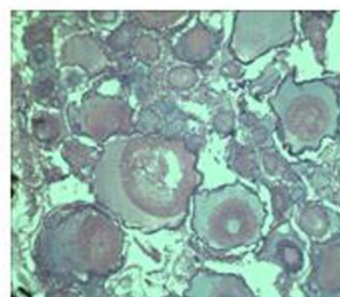

**70ppm**

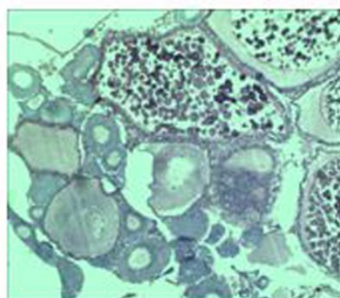

**80ppm**

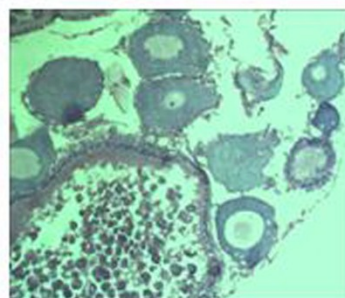

**90ppm**

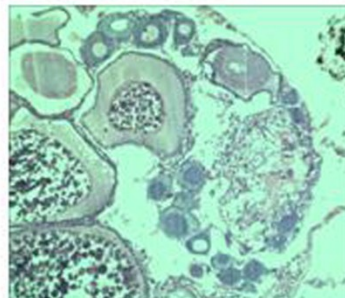

**100ppm**

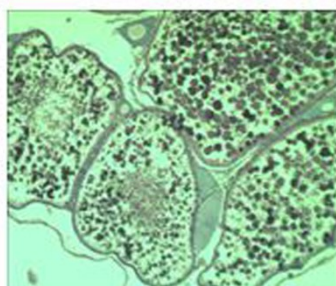



figure: Supplementary data- Sp-3b) Liver [gradual increment of necrosis].

10ppm

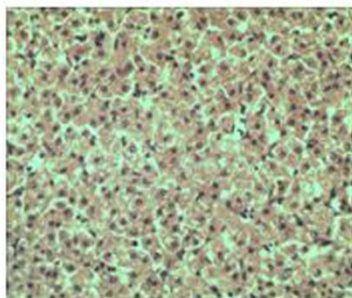

20ppm

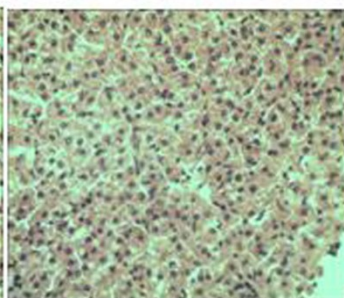

30ppm

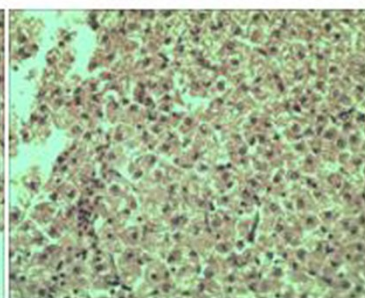

40ppm

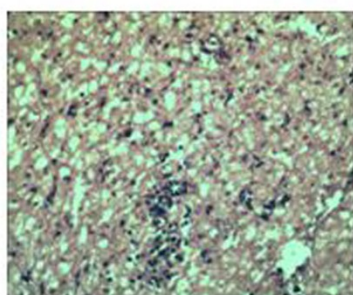

50ppm

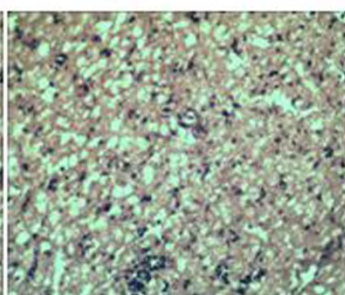

60ppm

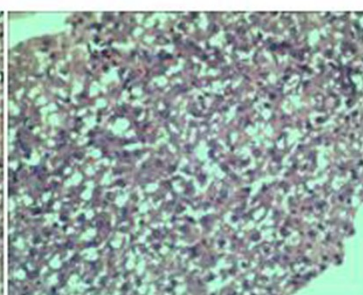

70ppm

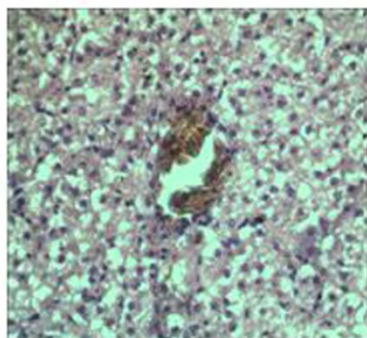

80ppm

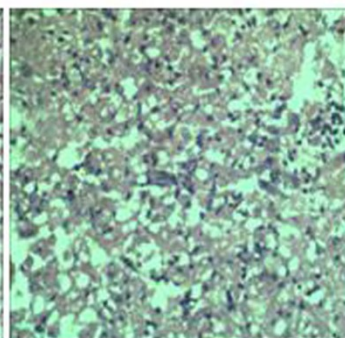

90ppm

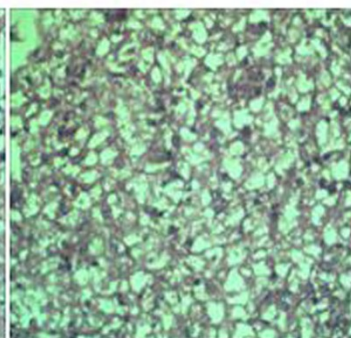

100ppm

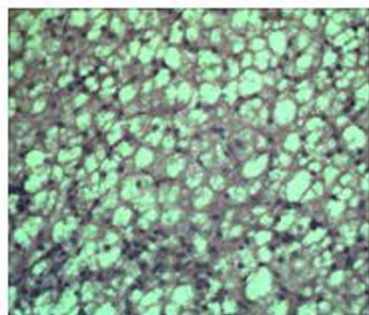

figure: Supplementary data- Sp-3c) Dissection of treated female fishes.

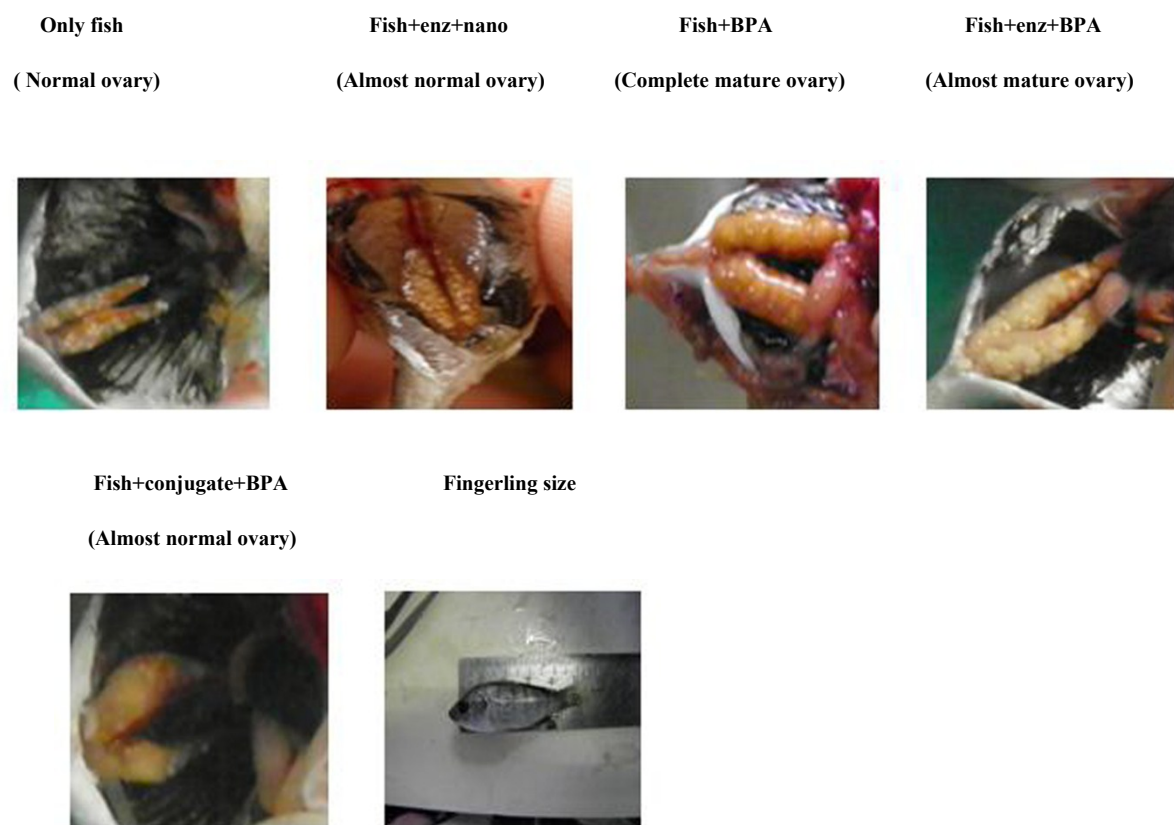

figure: Supplementary data- Sp-3d) ESI-MS of only water sample used for exposure experiment.

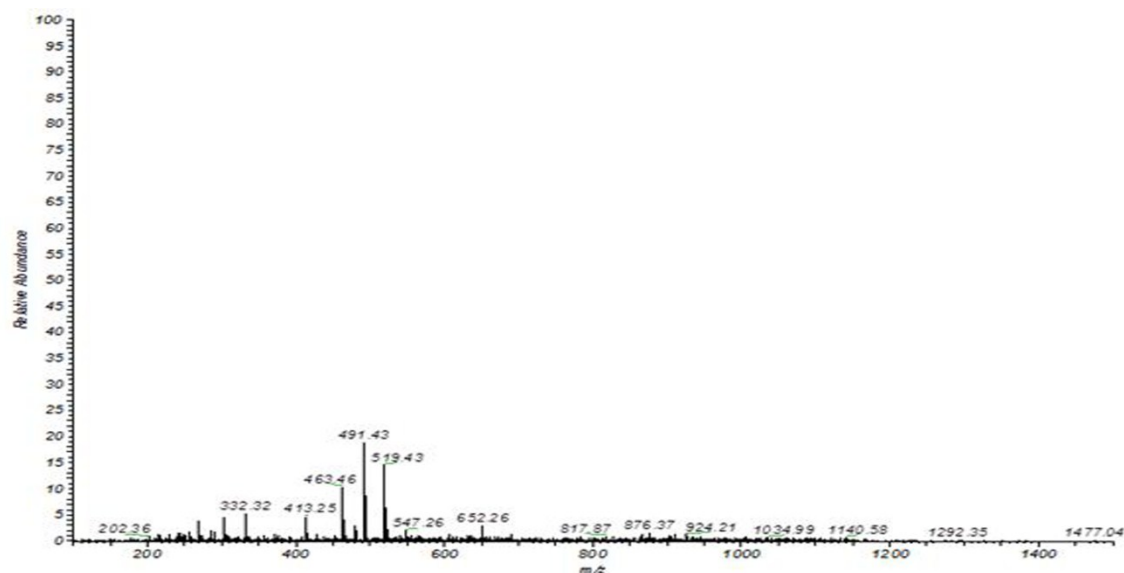

# Sp-4) [FPLC of male fish liver sample]

figure: Supplementary data- Sp-4a) BPA+ Fish

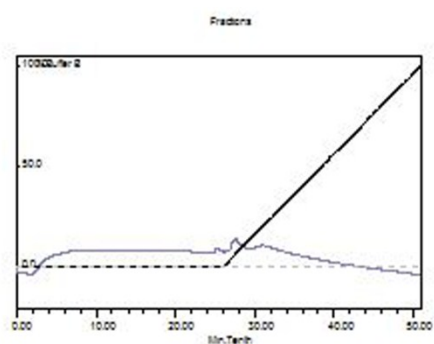

figure: Supplementary data-Sp-4b) BPA+ E+ Fish

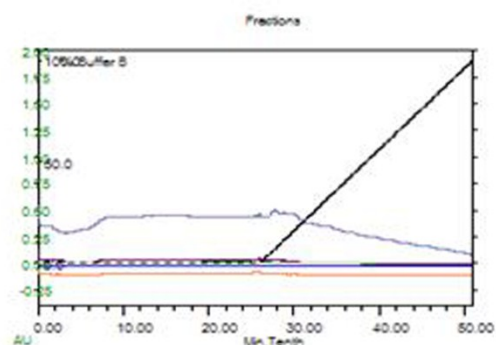

figure: Supplementary data- Sp-4c) Normal fish

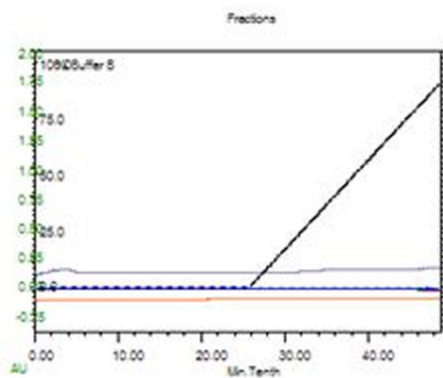

figure: Supplementary data- Sp-4d) Fish + E + Nano

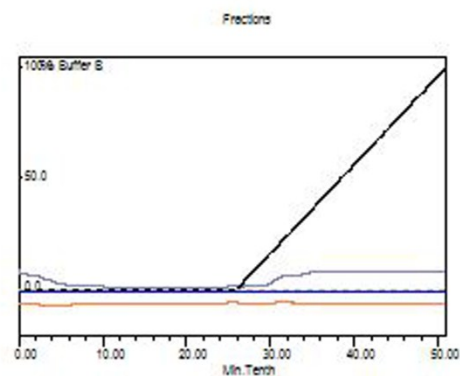

figure: Supplementary data- Sp-4e) Fish + conjugate +BPA

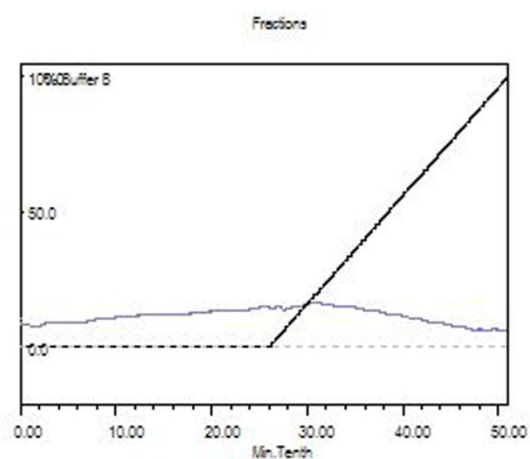

figure: Supplementary data- Sp-4f) SDS-PAGE of differentially treated female fish vitellogenin after getting from FPLC

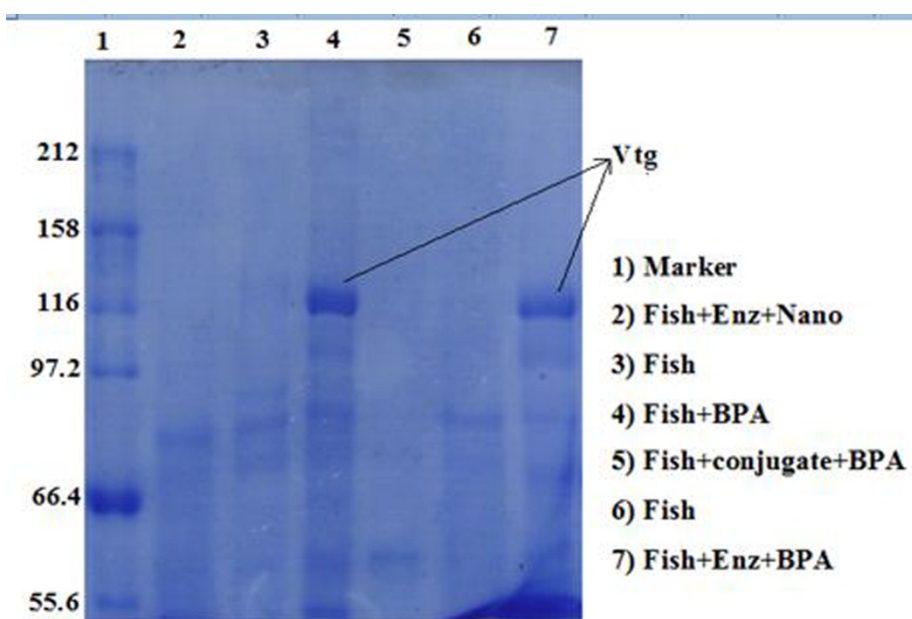

Supplement: c6ra15098e1.pdf [file c6ra15098e1.pdf]
